# Supplementary material for: Instantaneous antidepressant effect of lateral habenula deep brain stimulation in rats studied with functional MRI
Source: eLife. 2023 Jun 1;12:e84693. doi: 10.7554/eLife.84693 (PMC10234627; doi:10.7554/eLife.84693)
Supplement: Supplementary file 1. [file elife-84693-supp1.xlsx]

## Sheet: Supplementary file 1a
Supplementary file 1a
	WKY					LPS
			P value					P value
	SPT	control vs. Pre	3.26309e-11			SPT	baseline vs. Pre	0
		control vs. DBS	0.95753				baseline vs. DBS	0.13811
		Pre vs. DBS	1.70842e-06				Pre vs. DBS	0
	FST	control vs. Pre	0.000162093			FST	baseline vs. Pre	0.99901
		control vs. DBS	0.8682				baseline vs. DBS	3.67526e-06
		Pre vs. DBS	4.19026e-06				Pre vs. DBS	3.95245e-06
	OFT					OFT
	Average speed in entire field (cm/s)	control vs. Pre	1.19222e-09			Average speed in entire field (cm/s)	baseline vs. Pre	0
		control vs. DBS	0.02786				baseline vs. DBS	0.31363
		Pre vs. DBS	1.30461e-07				Pre vs. DBS	1.34633e-07
	Total time spent in immobility (s)	control vs. Pre	2.53867e-12			Total time spent in immobility (s)	baseline vs. Pre	0
		control vs. DBS	0.03278				baseline vs. DBS	0.54156
		Pre vs. DBS	1.81274e-09				Pre vs. DBS	0
	Number of entries into center	control vs. Pre	0.000216551			Number of entries into center	baseline vs. Pre	0.025
		control vs. DBS	0.33975				baseline vs. DBS	0.814
		Pre vs. DBS	0.01415				Pre vs. DBS	0.045
	Time in center (s)	control vs. Pre	0.000231246			Time in center (s)	baseline vs. Pre	0.034
		control vs. DBS	0.38396				baseline vs. DBS	1
		Pre vs. DBS	0.01427				Pre vs. DBS	0.034
	Distance traveled in the center (cm)	control vs. Pre	0.000231246			Distance traveled in the center (cm)	baseline vs. Pre	0.018
		control vs. DBS	0.42666				baseline vs. DBS	0.637
		Pre vs. DBS	0.01427				Pre vs. DBS	0.059
	Average speed in center (cm/s)	control vs. Pre	0.000231246			Average speed in center (cm/s)	baseline vs. Pre	0.018
		control vs. DBS	0.06362				baseline vs. DBS	0.637
		Pre vs. DBS	0.01427				Pre vs. DBS	0.059
	Distance traveled in entire field (cm)	control vs. Pre	1.19405e-09			Distance traveled in entire field (cm)	baseline vs. Pre	0
		control vs. DBS	0.02785				baseline vs. DBS	0.31336
		Pre vs. DBS	1.30104e-07				Pre vs. DBS	1.35405e-07

## Sheet: Supplementary file 1b
Supplementary file 1b
			P value
	Change of average speed (DBS/non-DBS)	Red vs. Black	0.021
		Red vs. Blue	0
	Beta value of Septum	Red vs. Black	0.034
		Red vs. Blue	0.002
	Beta value of DBN	Red vs. Black	0
		Red vs. Blue	0
	Beta value of LPO	Red vs. Black	0
		Red vs. Blue	0
	Beta value of SLEA	Red vs. Black	0.028
		Red vs. Blue	0.006
	Beta value of LHA	Red vs. Black	0.006
		Red vs. Blue	0.001
	Beta value of IPN / VTA	Red vs. Black	0.108
		Red vs. Blue	0.013
	Beta value of DRN	Red vs. Black	0.008
		Red vs. Blue	0.001
